# Supplementary material for: E-cadherin expression in macrophages dampens their inflammatory responsiveness in vitro, but does not modulate M2-regulated pathologies in vivo
Source: PubMed Central journal article supplement (PMC4521155; doi:10.1038/srep12599), 2015-07-31
Supplement: srep12599-s1.pdf [file srep12599-s1.pdf]

## SUPPLEMENTARY INFORMATION

### **E-cadherin expression in macrophages dampens their inflammatory responsiveness *in vitro*, but does not modulate M2-regulated pathologies *in vivo***

Jan Van den Bossche<sup>1,2,\*</sup>, Damya Laoui<sup>1,2</sup>, Thomas Naessens<sup>3</sup>, Hermelijn H. Smits<sup>4</sup>, Cornelis H. Hokke<sup>4</sup>, Benoît Stijlemans<sup>1,2</sup>, Johan Grooten<sup>3</sup>, Patrick De Baetselier<sup>1,2</sup>, and Jo A. Van Ginderachter<sup>1,2</sup>

<sup>1</sup>Laboratory of Myeloid Cell Immunology, VIB, Brussels, Belgium

<sup>2</sup>Laboratory of Cellular and Molecular Immunology, Vrije Universiteit Brussel, Brussels, Belgium

\* Current address: Department of Medical Biochemistry, Experimental Vascular Biology, Academic Medical Center, Amsterdam, The Netherlands

<sup>3</sup>Department of Biomedical Molecular Biology, Ghent University, Ghent, Belgium

<sup>4</sup>Department of Parasitology, Leiden University Medical Centre, Leiden, The Netherlands

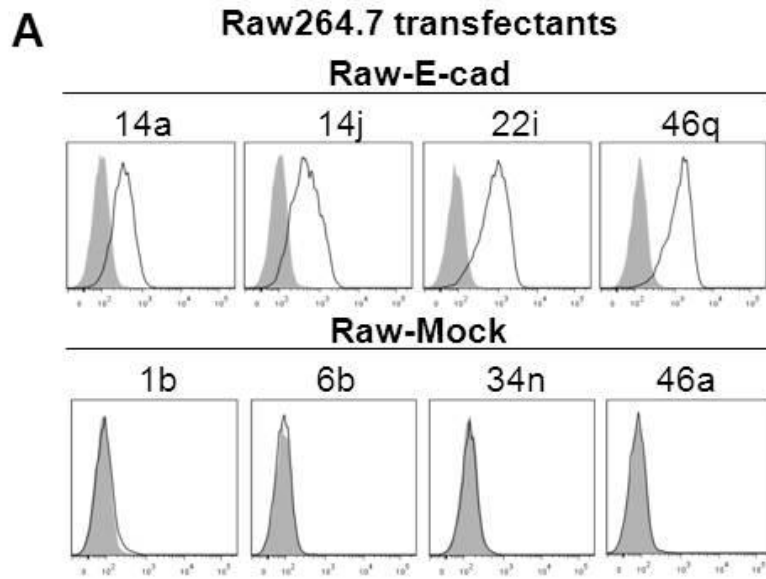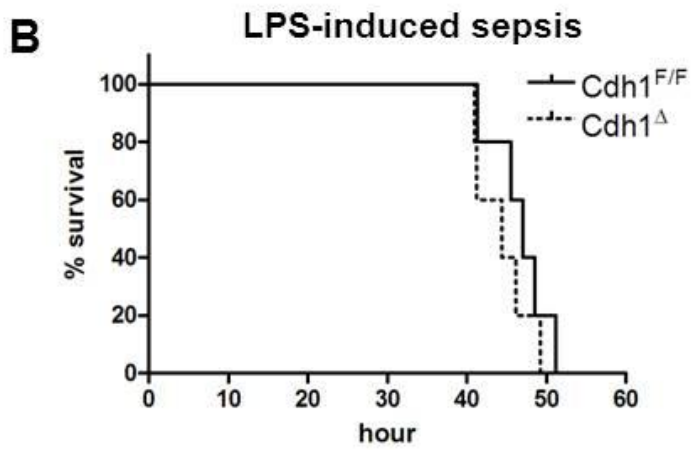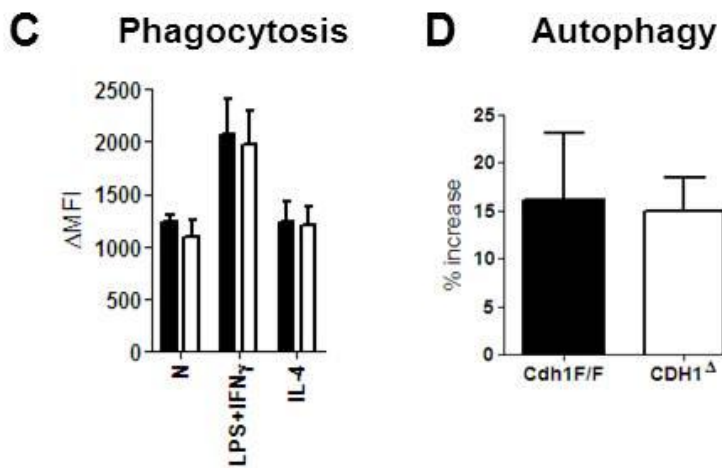

Figure S1

**Figure S1. (A) Raw264.7 transfectants.** Four independent E-cadherin over-expressing Raw264.7 transfectants and four E-cadherin-negative mock transfectants were generated as described earlier <sup>6</sup> and the E-cadherin surface expression of these clones was assessed by flow cytometry. **(B) LPS-induced sepsis.** An LPS-induced sepsis experiment was performed as typical M1 response *in vivo*. Hereto, 5 Cdh1<sup>Δ</sup> and 5 Cdh1<sup>F/F</sup> mice (n=5) were injected with 12 mg/kg LPS (from *Escherichia coli* 0111:B4, Sigma) after which their survival was recorded. No differences were observed between the Cdh1<sup>Δ</sup> mice and their WT (Cdh1<sup>F/F</sup>) counterparts. **(C) Phagocytosis.** BMDM from naive Cdh1<sup>Δ</sup> and Cdh1<sup>F/F</sup> mice (n=3) were treated with 10 ng/ml LPS + 10 U/ml IFN $\gamma$  or with IL-4, or remained untreated for 24 h. Next, macrophages were cultured for 1 h at 4°C (control) or 37°C in the presence of green fluorescent latex beads (Polyscience, 1/5000 dilution). Latex bead uptake was assessed by flow cytometry and is shown as  $\Delta\text{MFI} = [\text{median fluorescence intensity}]_{37^\circ\text{C}} - [\text{median fluorescence intensity}]_{4^\circ\text{C}}$ . **(D) Autophagy.** Cdh1<sup>Δ</sup> and Cdh1<sup>F/F</sup> BMDM were treated for 24 h with 500 nM rapamycin to induce autophagy or were left untreated. Next, a Cyto-ID Autophagy Detection Kit (Enzo Life Sciences) was used according to the manufacturer's protocol, followed by flow cytometry. Data show the rapamycin-induced increase in autophagy, compared to untreated macrophages.

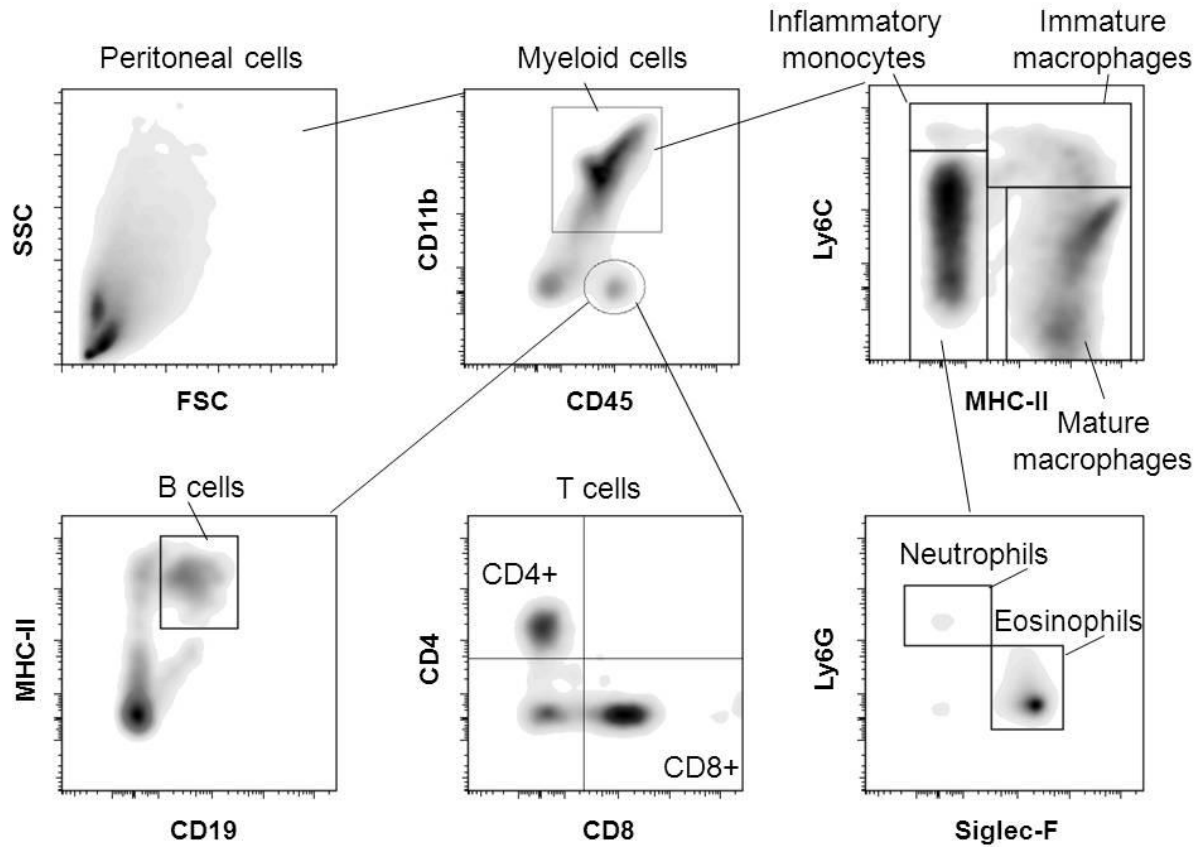

**Figure S2. FACS gating strategy on freshly isolated peritoneal cells from *Taenia crassiceps* infected  $Cdh1^{F/F}$  mice.** Myeloid cells and other leukocytes were first separated based on CD11b/CD45 expression. Within the CD11b<sup>+</sup>/CD45<sup>+</sup> leukocyte gate, B cells were gated as MHC II<sup>high</sup>/CD19<sup>+</sup> and T cells were separated based on their differential CD4 and CD8 expression. Within the CD11b<sup>+</sup> myeloid cell gate Ly6C/MHC II staining discriminates between Ly6C<sup>high</sup>/MHC II<sup>-</sup> inflammatory monocytes, Ly6C<sup>high</sup>/MHC II<sup>+</sup> immature macrophages and Ly6C<sup>low to int</sup>/MHC II<sup>high</sup> mature macrophages. Within the Ly6C<sup>lo to int</sup>/MHC II<sup>-</sup> gate, neutrophils were selected as Ly6G<sup>+</sup> and eosinophils were gated as Siglec-F<sup>+</sup>.

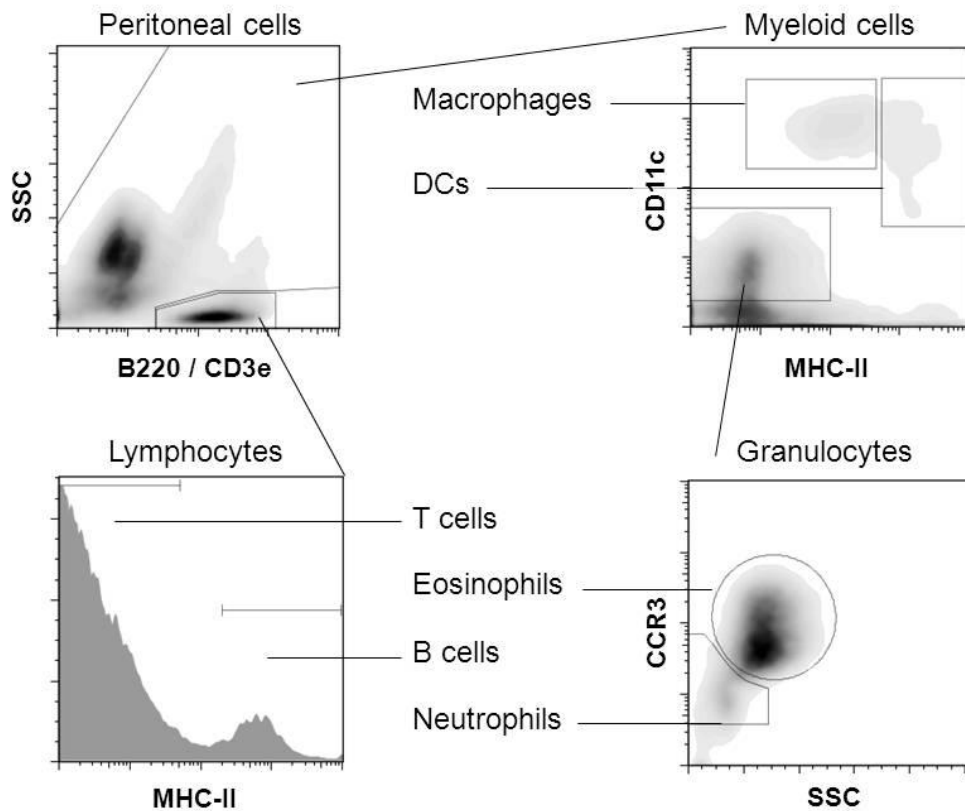

**Figure S3. FACS gating strategy on cells of the bronchoalveolar lavage (BAL) of  $Cdh1^{F/F}$  mice (4x OVA).** First, lymphocytes were gated based on their B220/CD3 expression and low side scatter and further selected as B or T cells according to their high or low MHC II expression, respectively. Within the myeloid cell gate, macrophages were selected as  $CD11c^{hi}/MHC II^{int}$  and DCs as  $CD11c^{high}/MHC II^{high}$ . Within the  $CD11c^{-}/MHC II^{-}$  gate, eosinophils were gated as  $CCR3^{hi}$  and the remaining  $SSC^{int}$  population was marked as neutrophils.
